# Supplementary material
Source: PubMed Central journal article supplement (PMC7447526)

**Appendix 3.** Percent fluid volume change for Partial Return and Full Return experiments. Clusters of gray dots are stance phase minima for steps within a cycle. Black dots are means of all stance phase minima within a cycle. White dots are projected data. Intervention conducted between the 4<sup>th</sup> and 5<sup>th</sup> cycle. Left graph: anterior. Right graph: posterior.

PARTIAL RETURN EXPERIMENT

Participant # 1

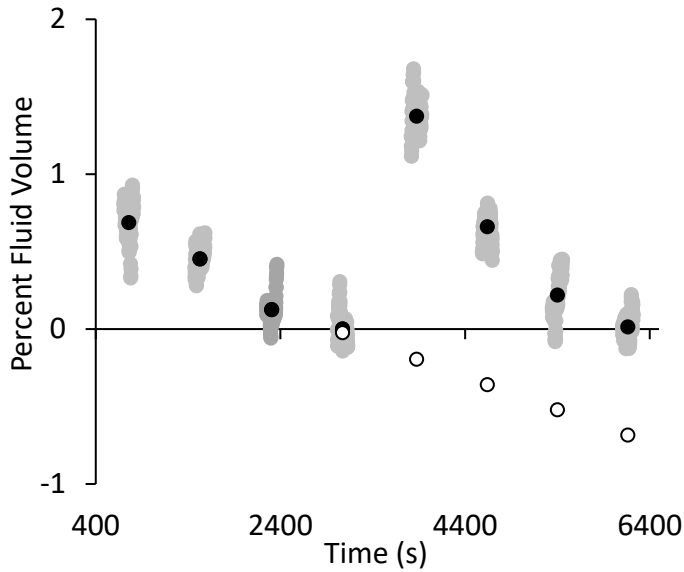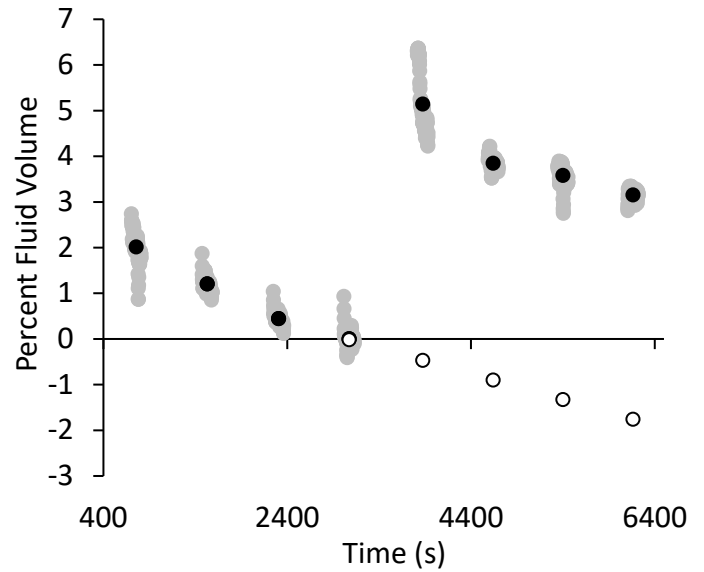

Participant # 2

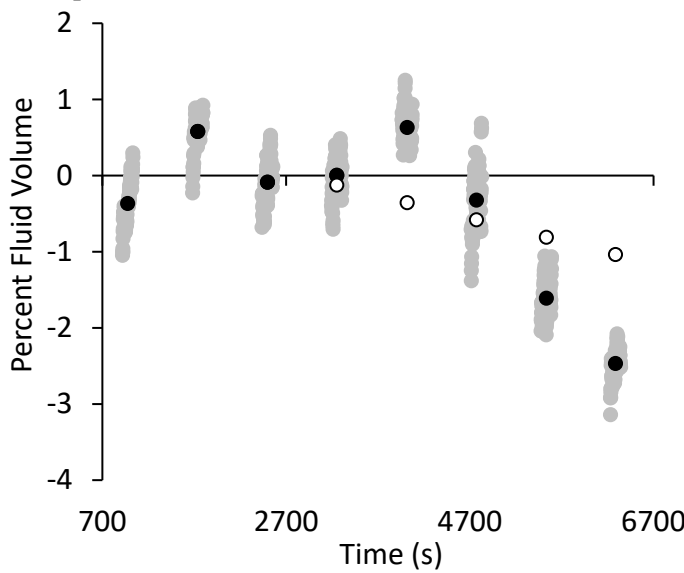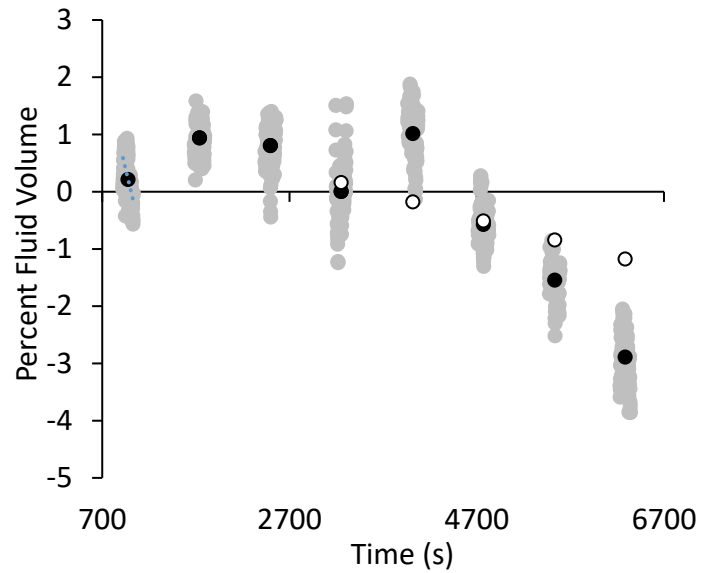

Participant # 3

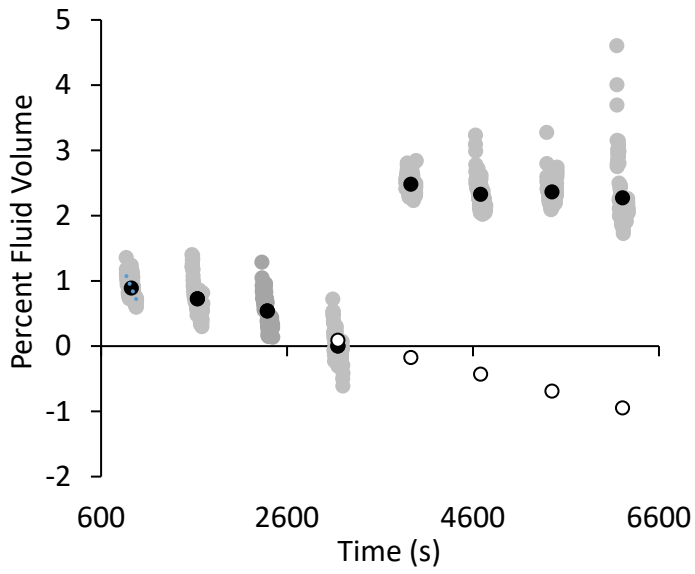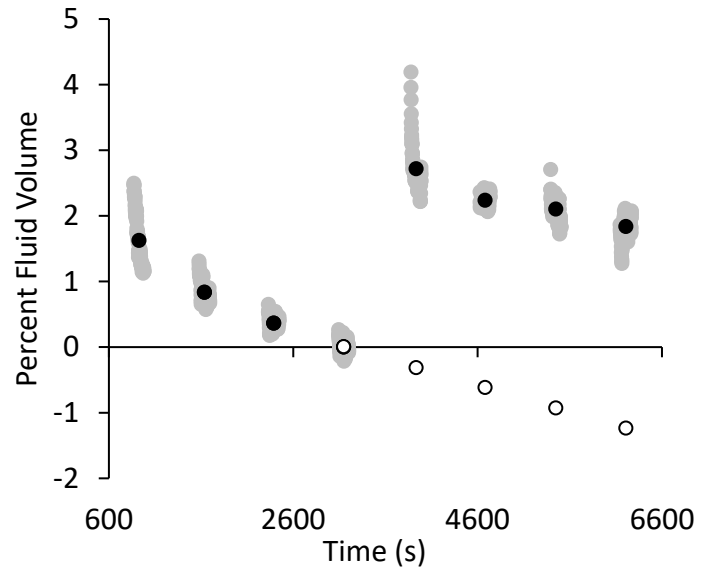

Participant # 4

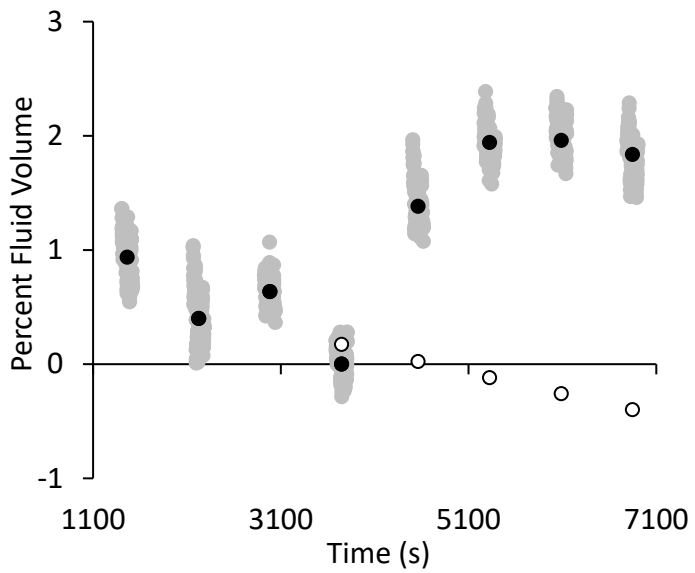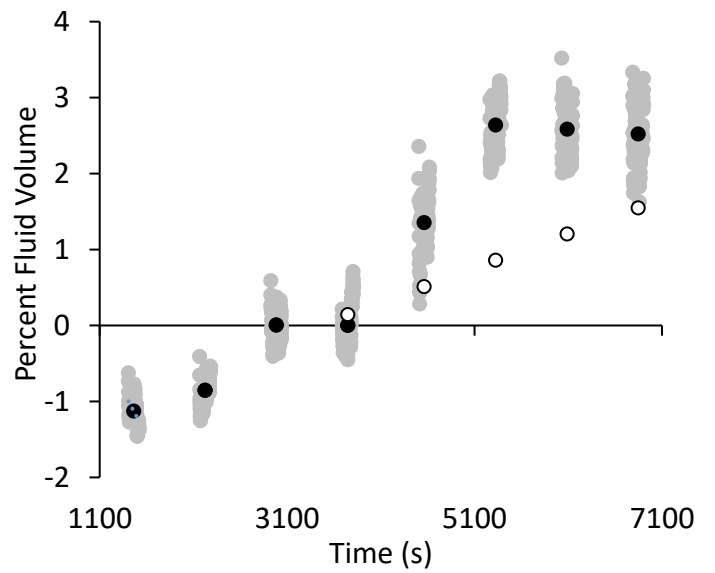

Participant # 5

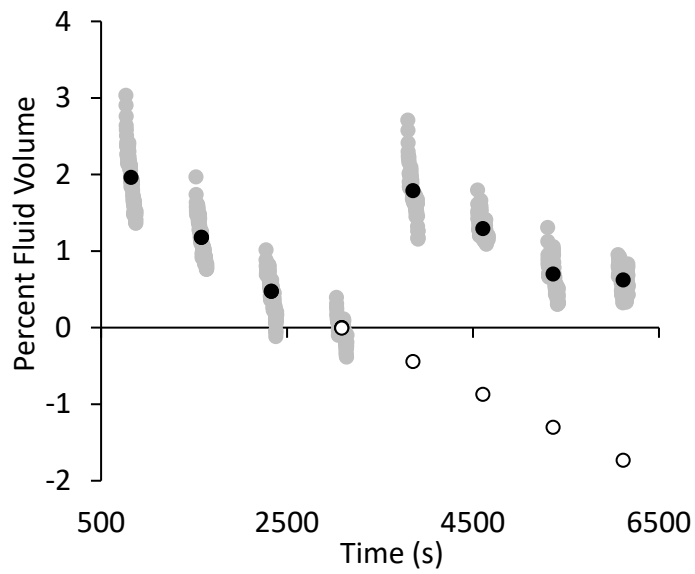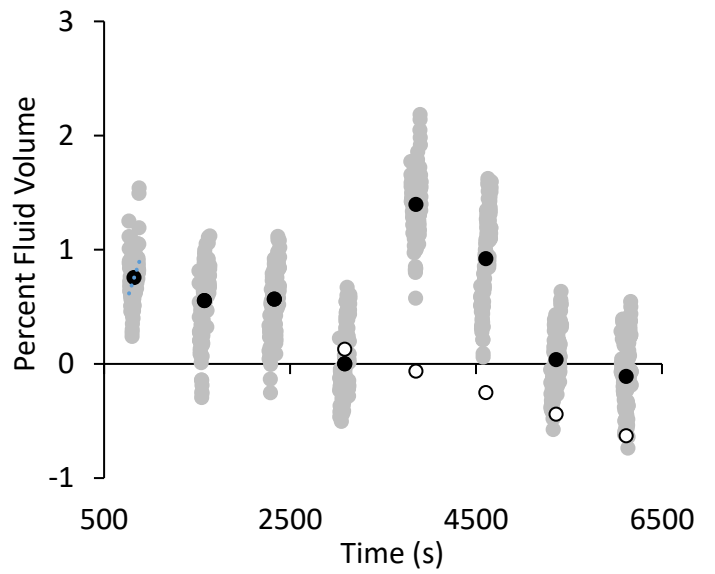

Participant # 6

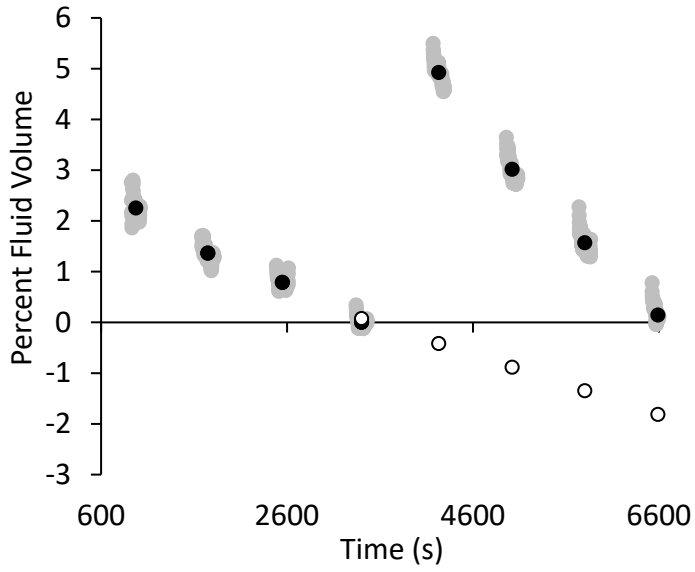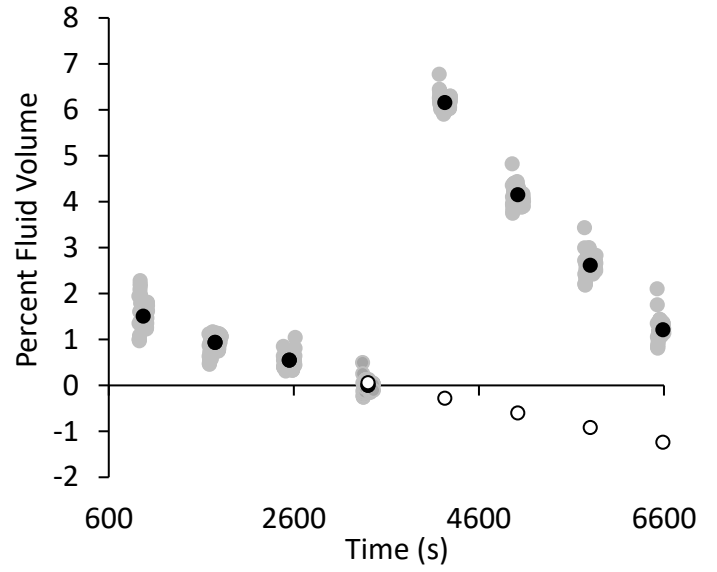

Participant # 7

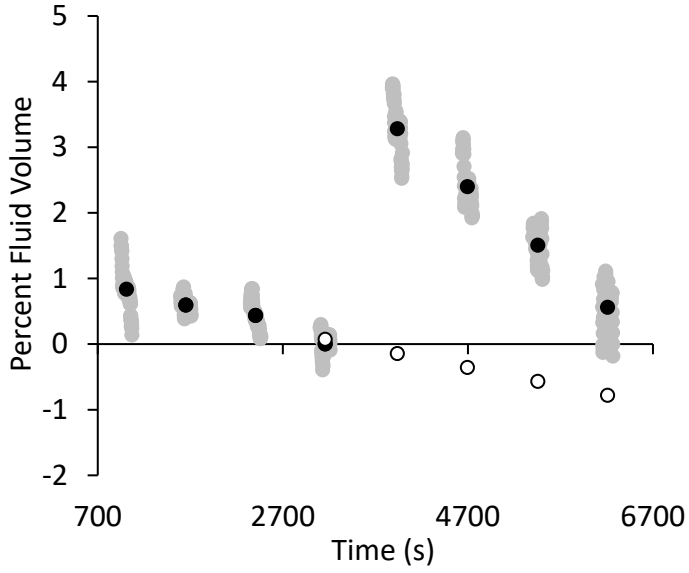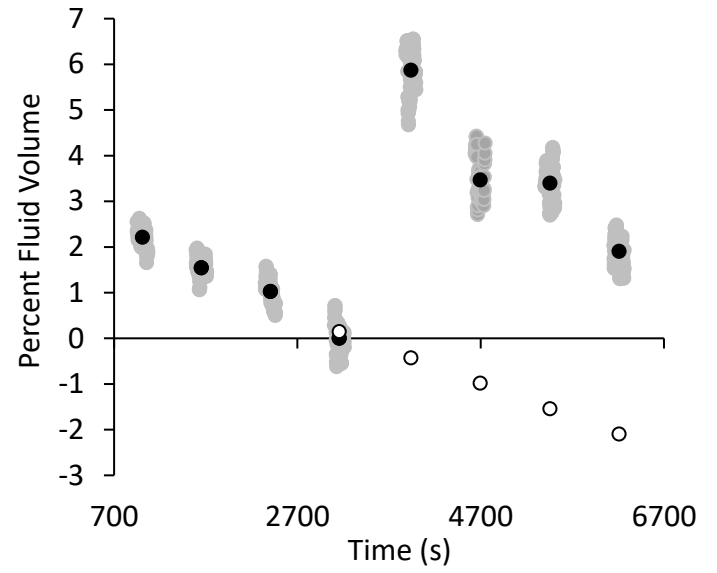

Participant # 8

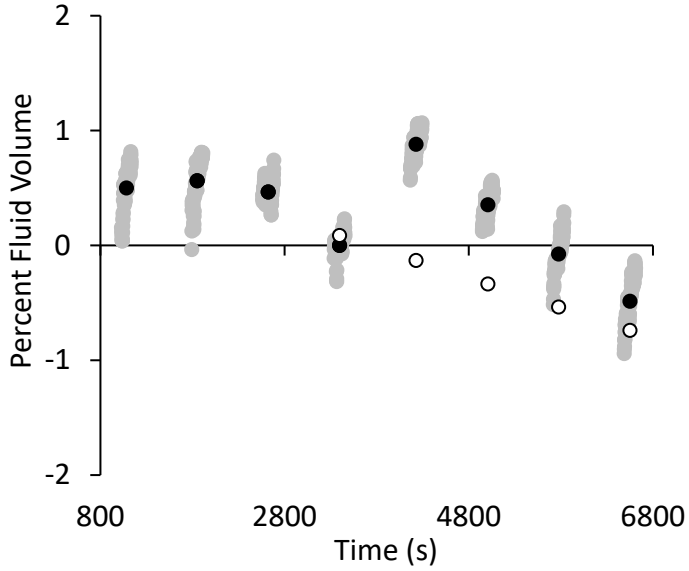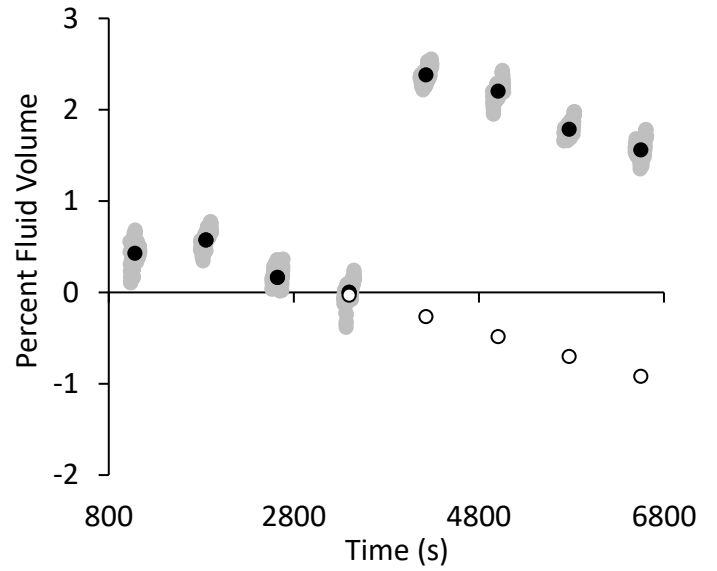

Participant # 9

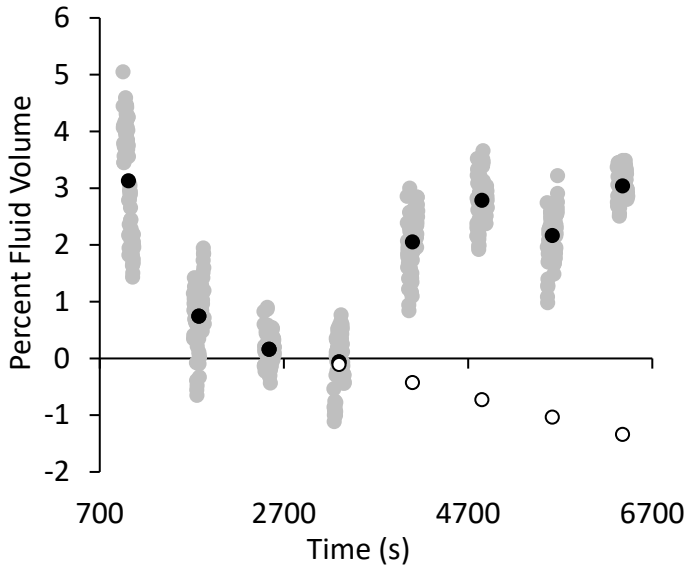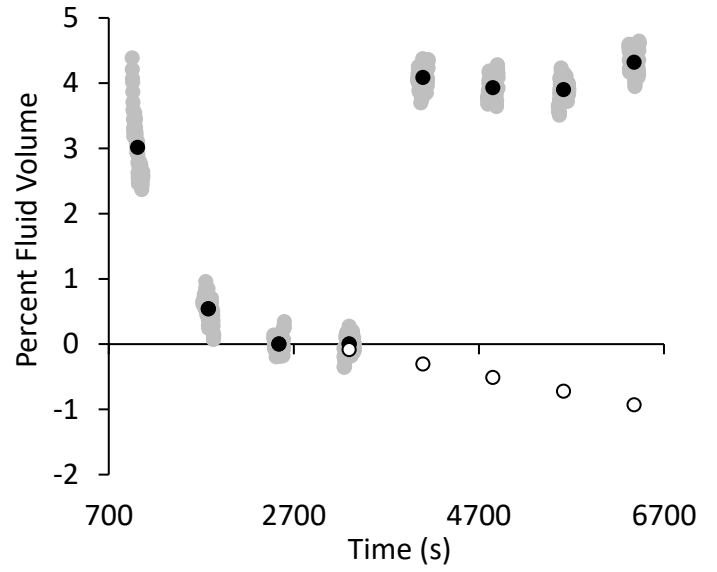

Participant # 10

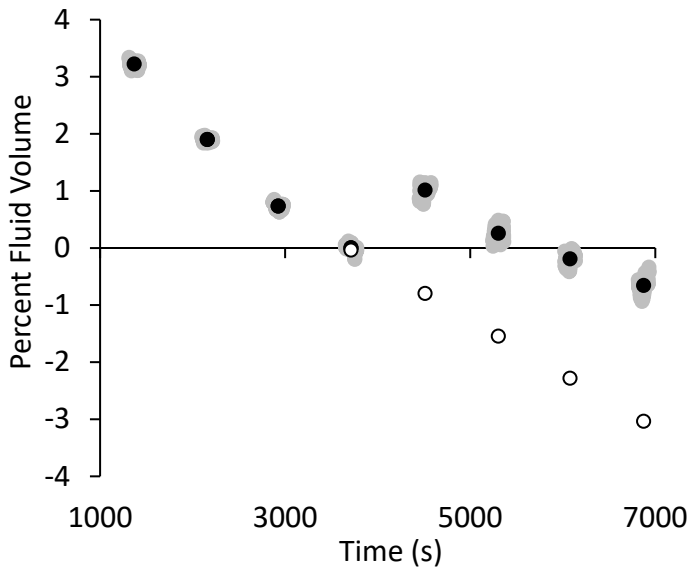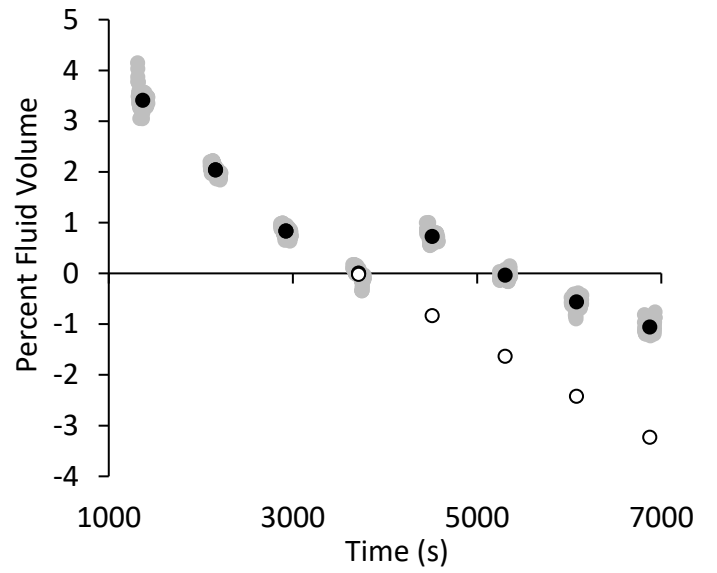

Participant # 11

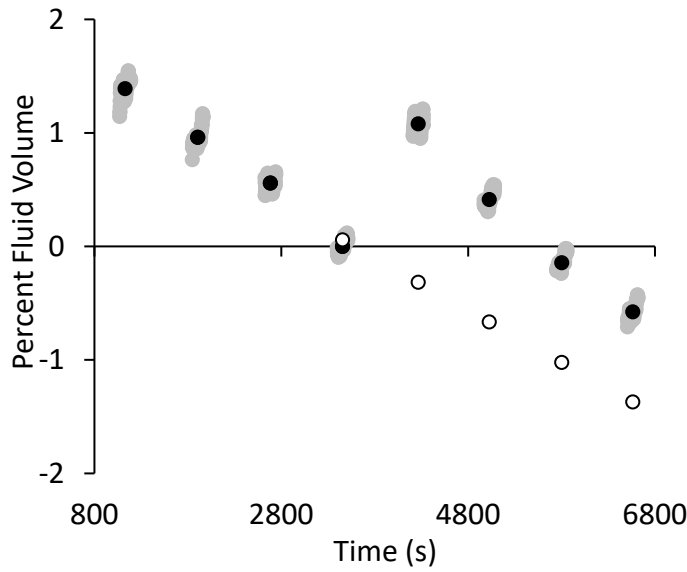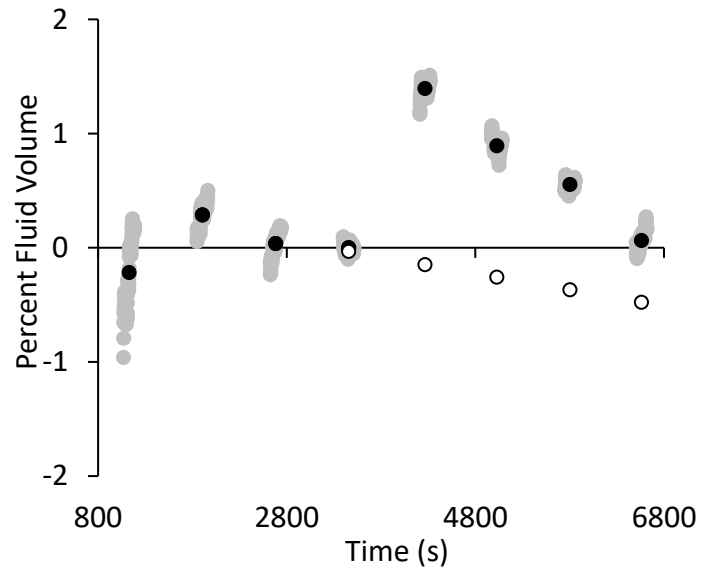

Participant # 12

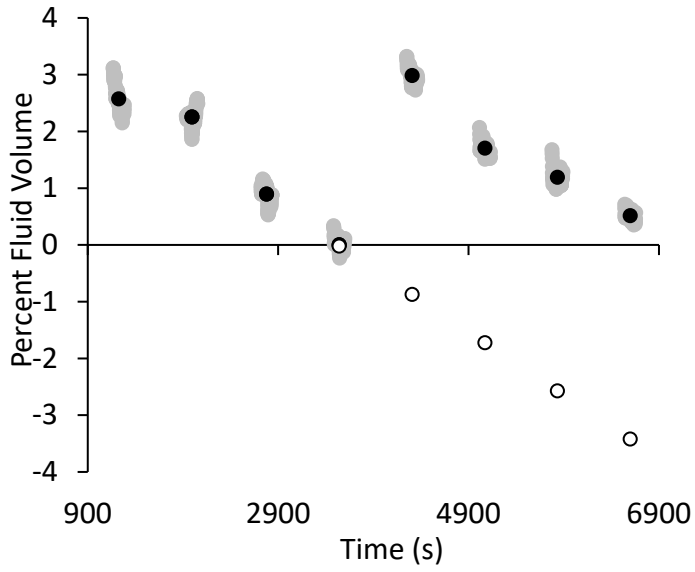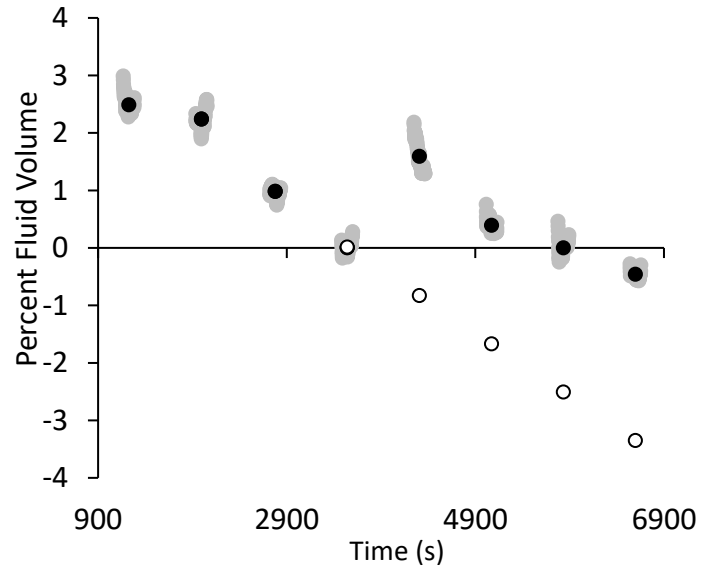

Participant # 13

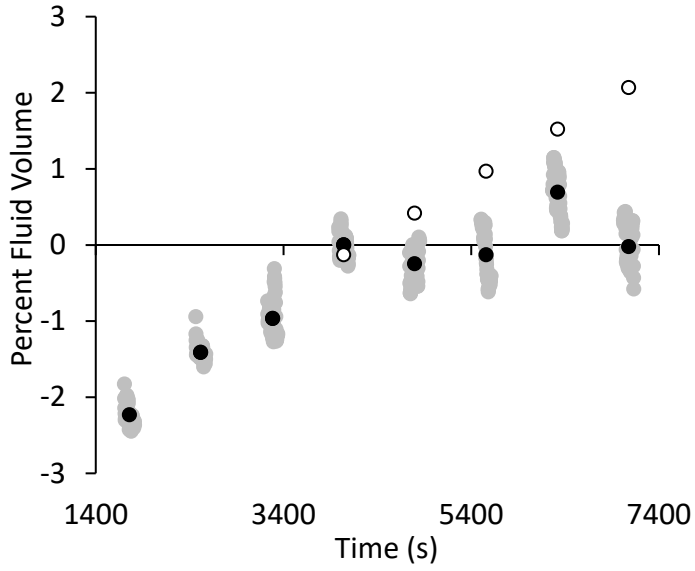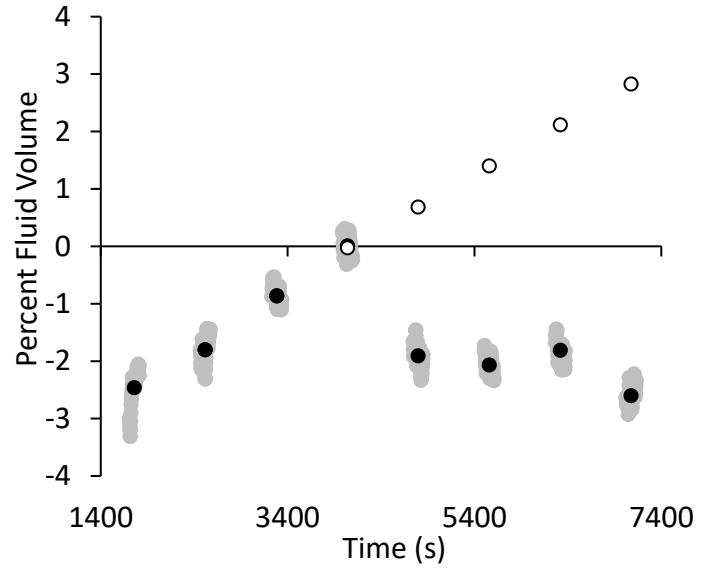

Participant # 14

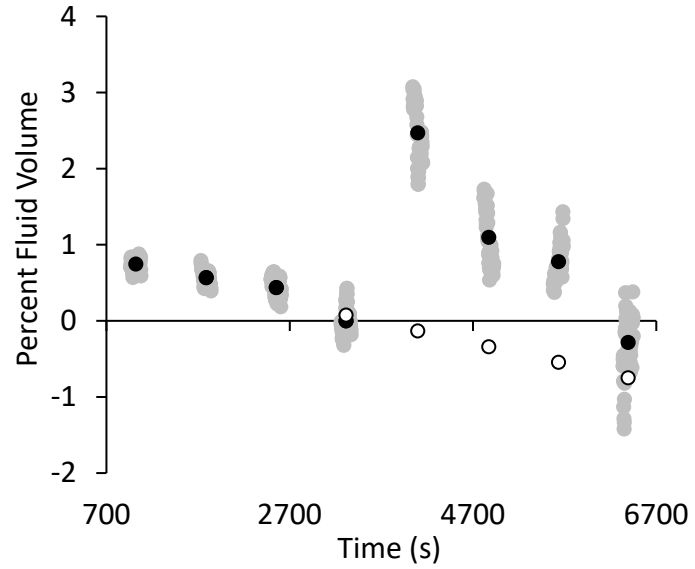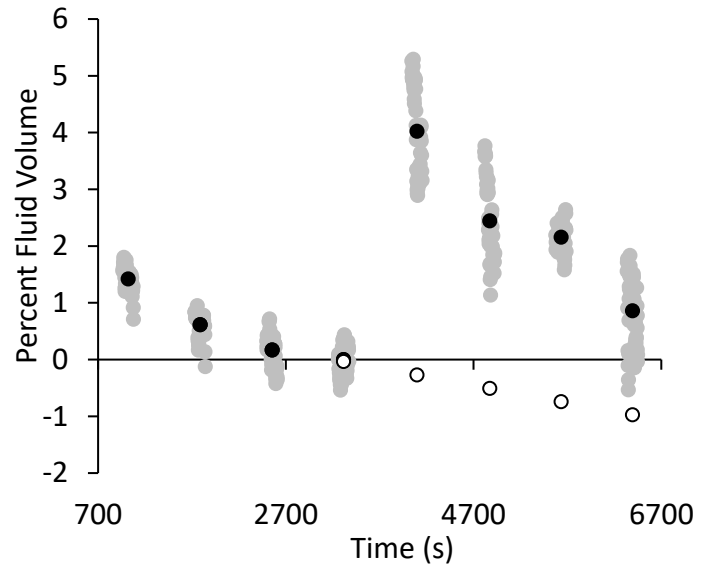

Participant # 15

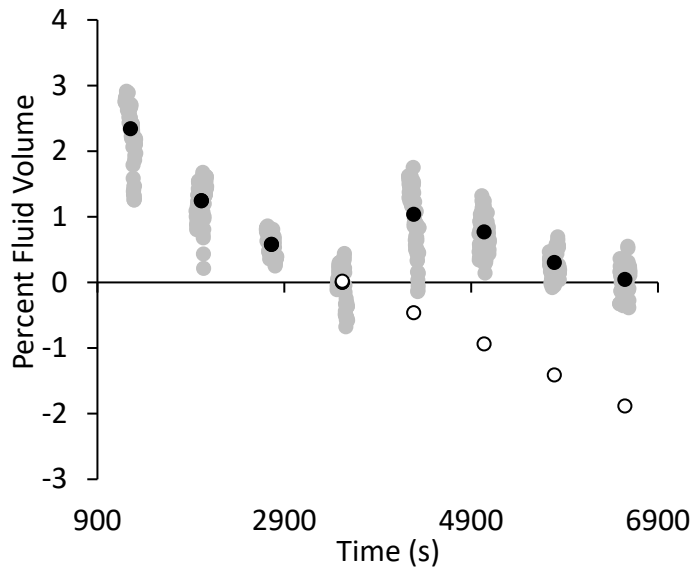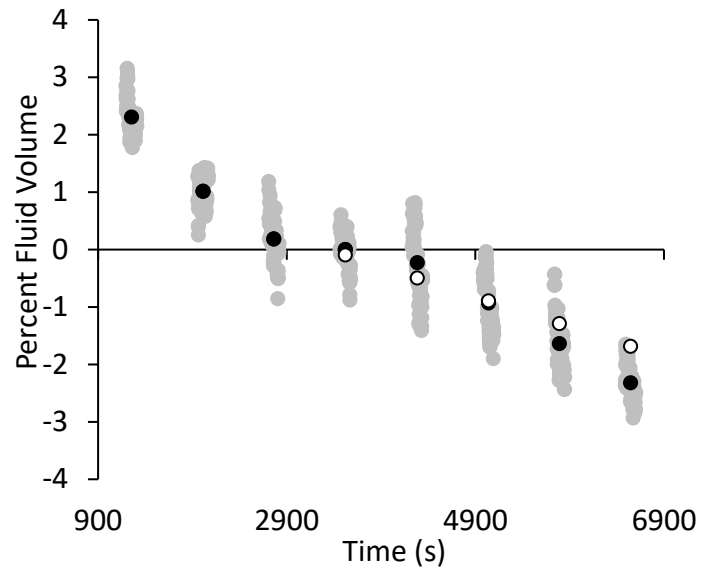

FULL RETURN EXPERIMENT

Participant # 1

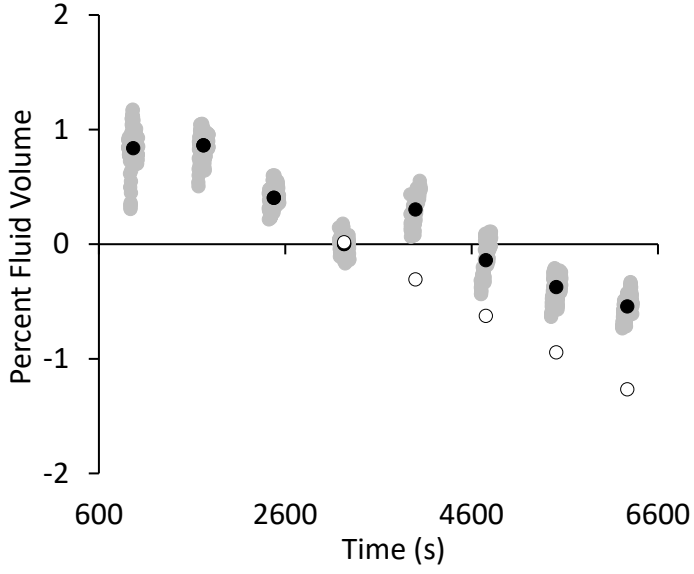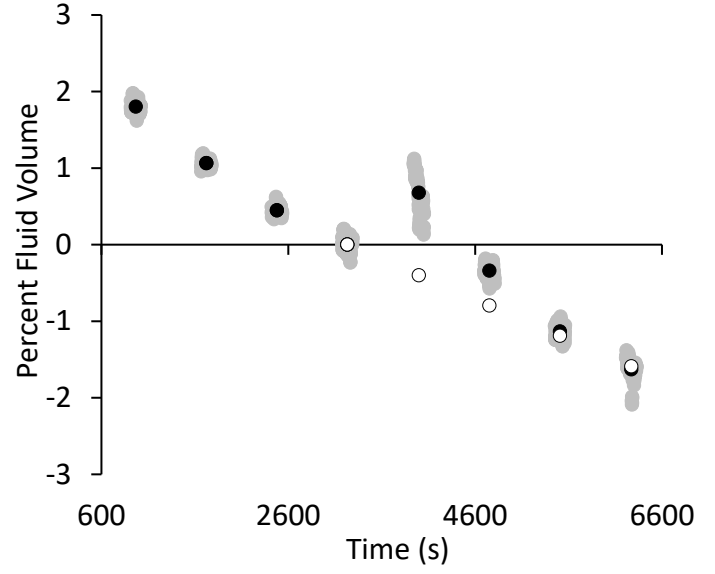

Participant # 2

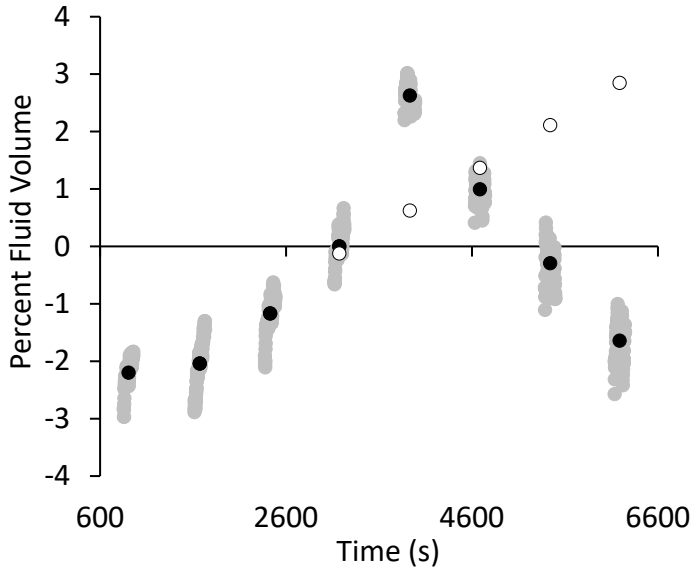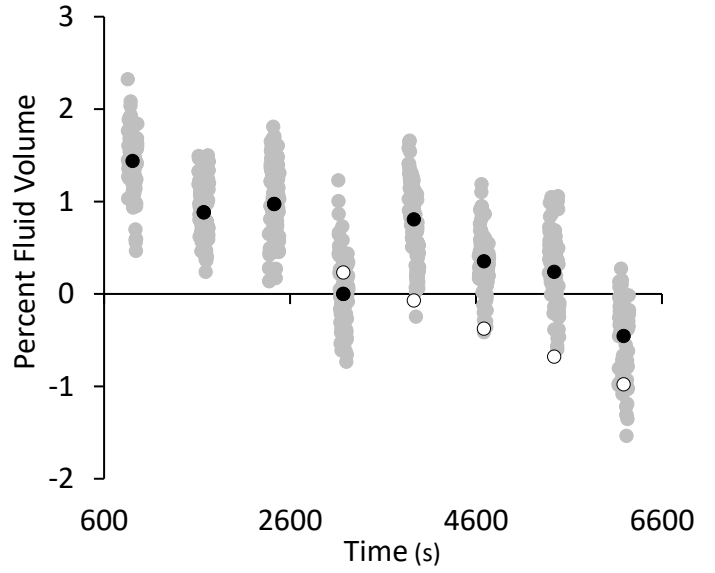

Participant # 3

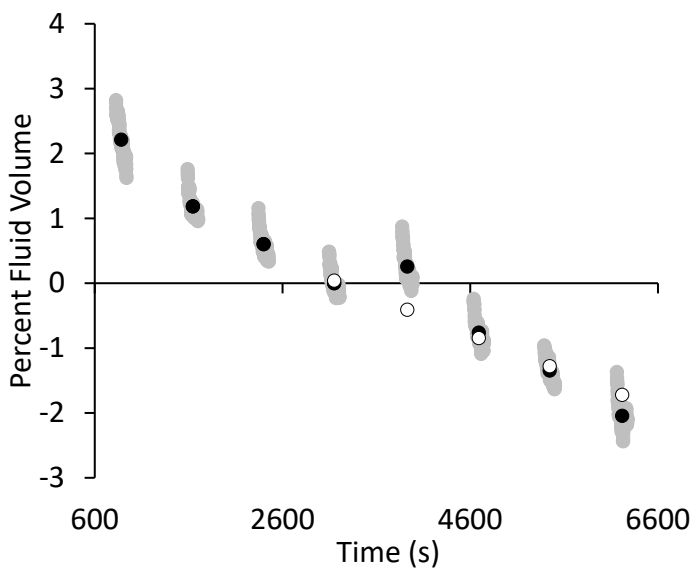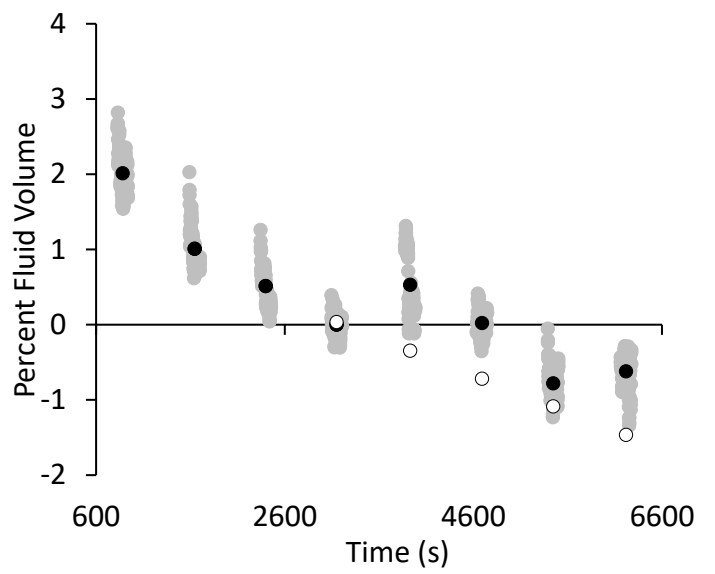

Participant # 4

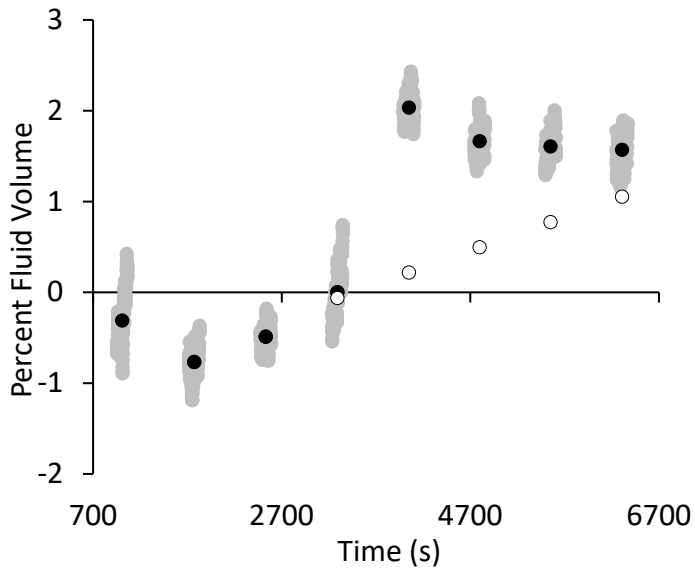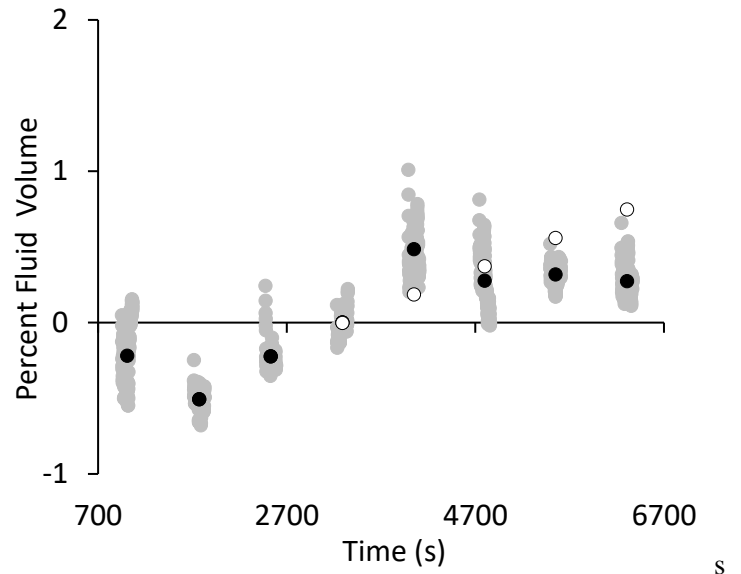

Participant # 5

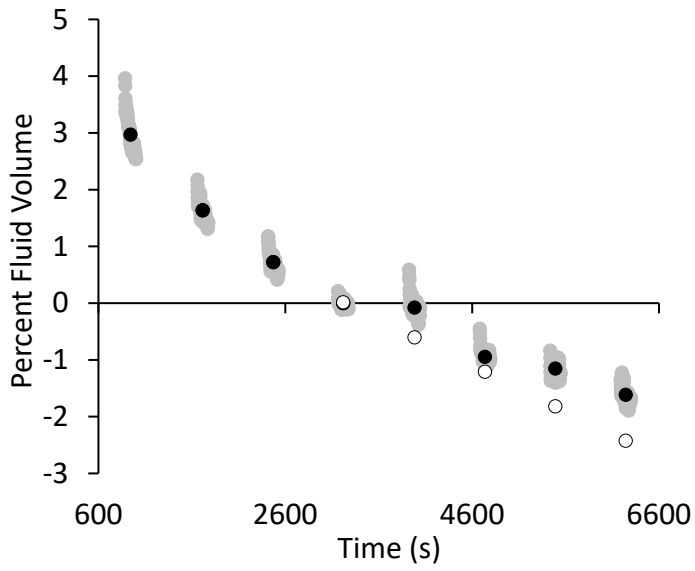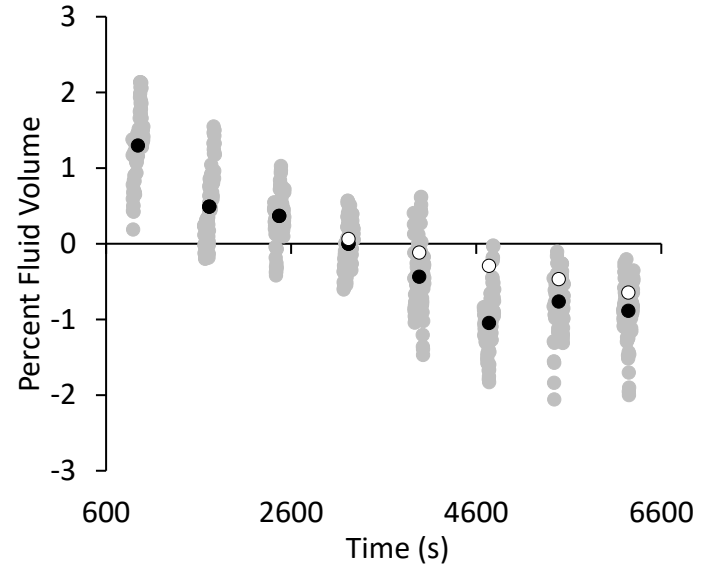

Participant # 6

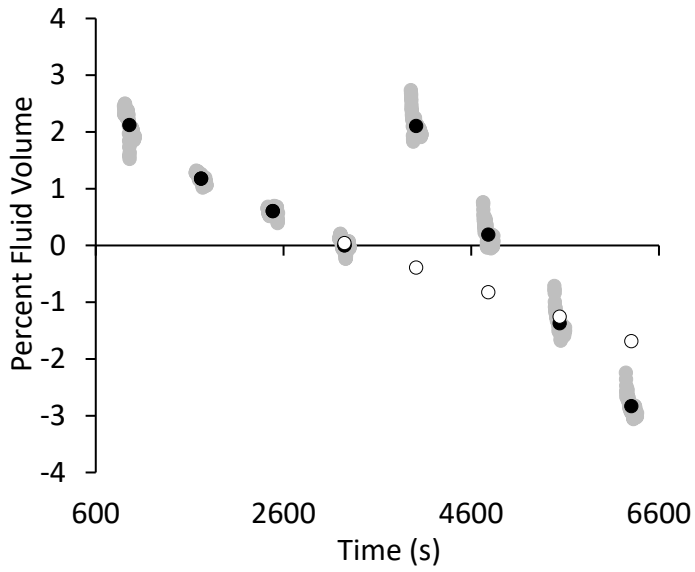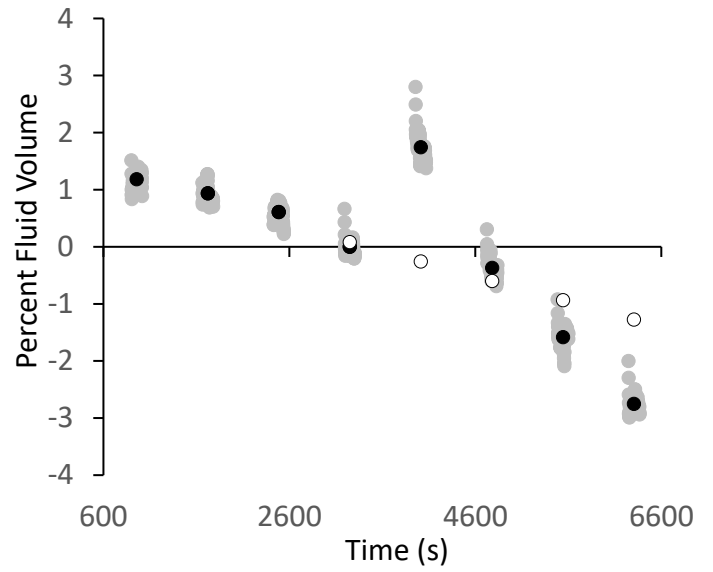



Participant # 7

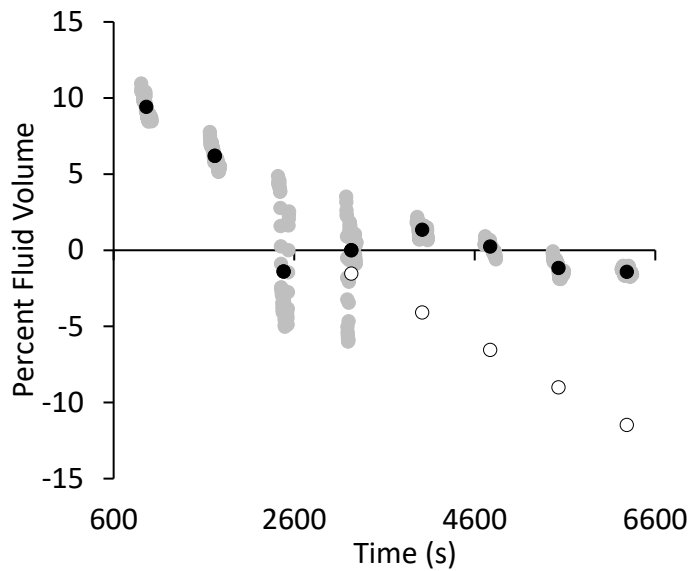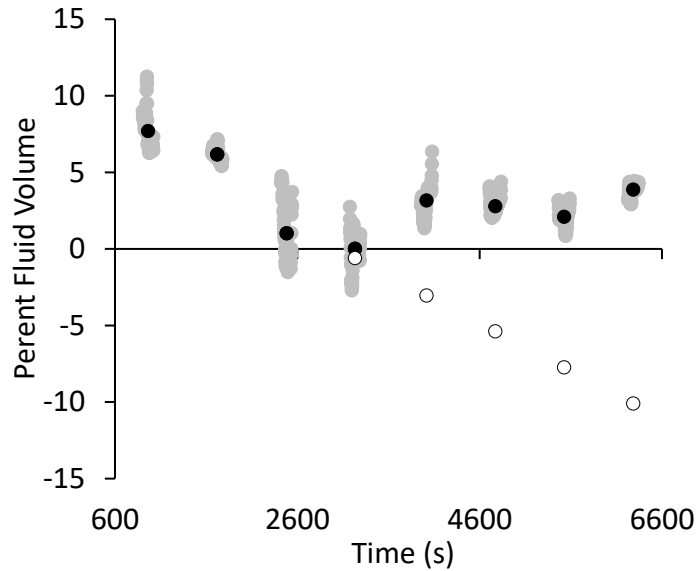

Participant # 8

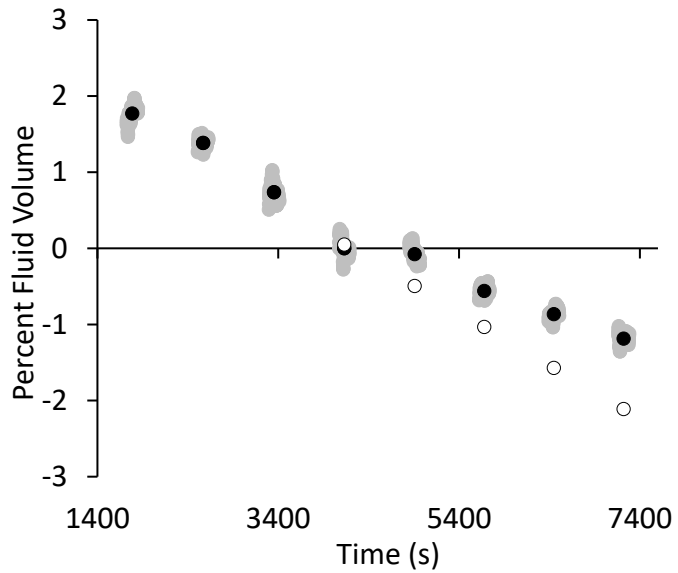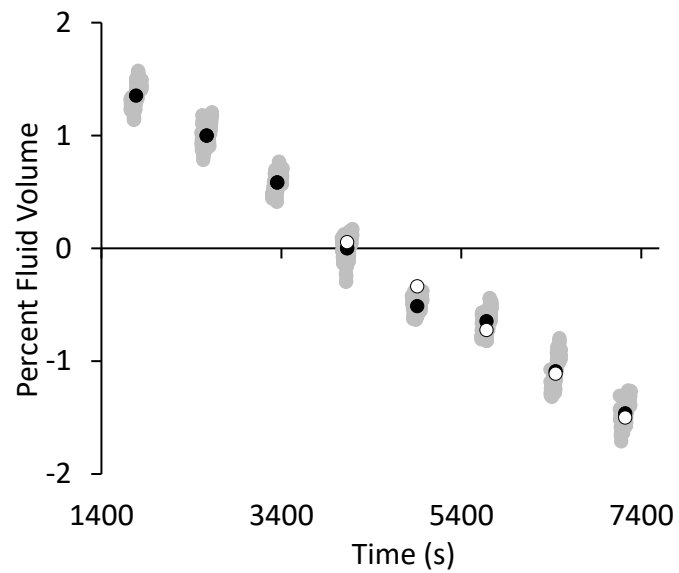

Participant # 9

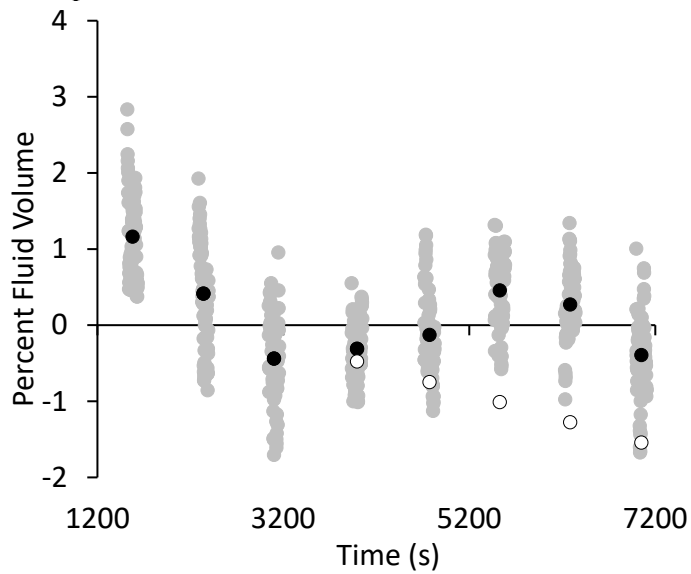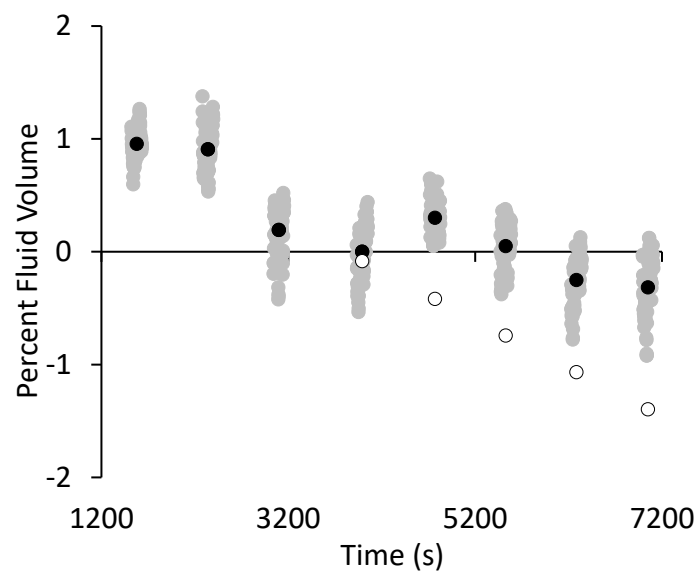

Participant # 10

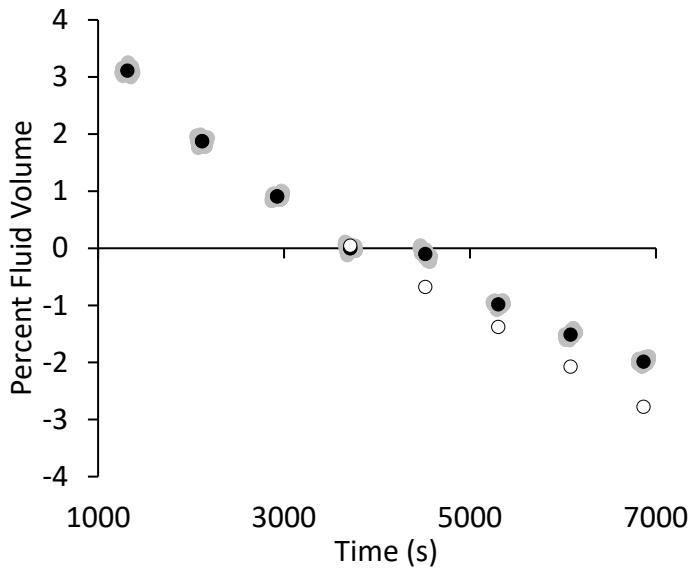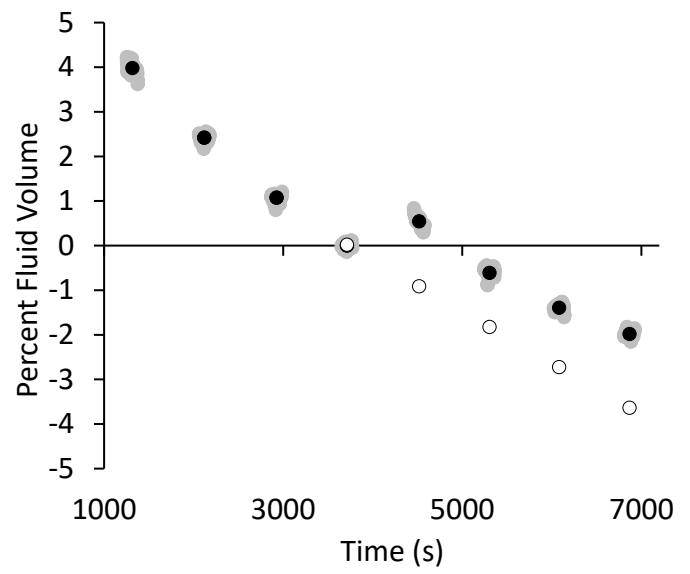

Participant # 11

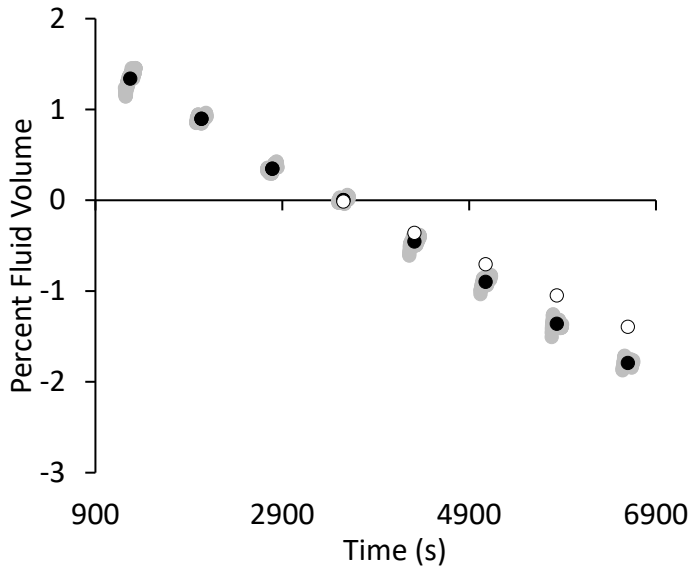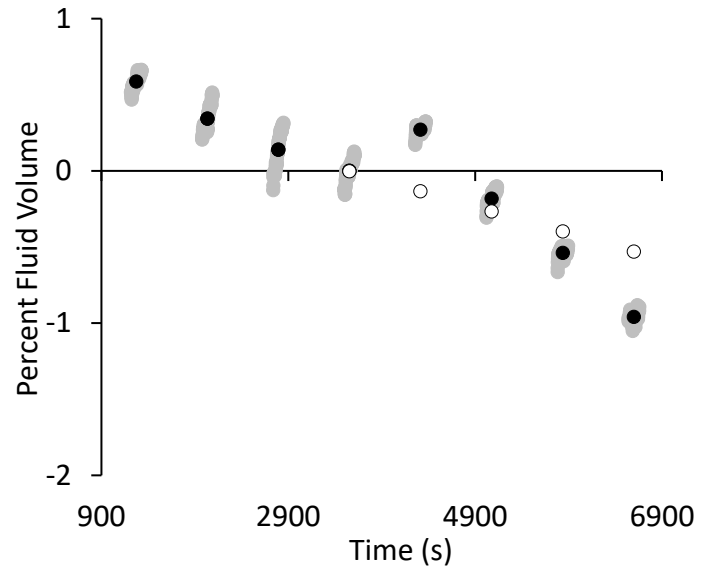

Participant # 12

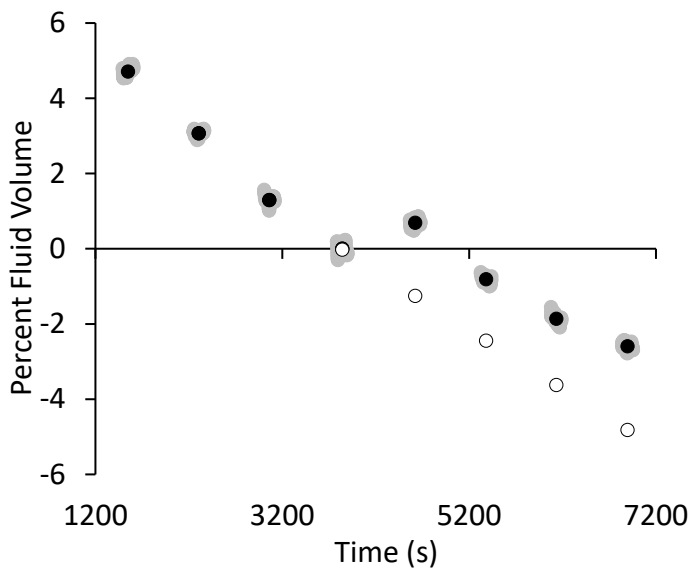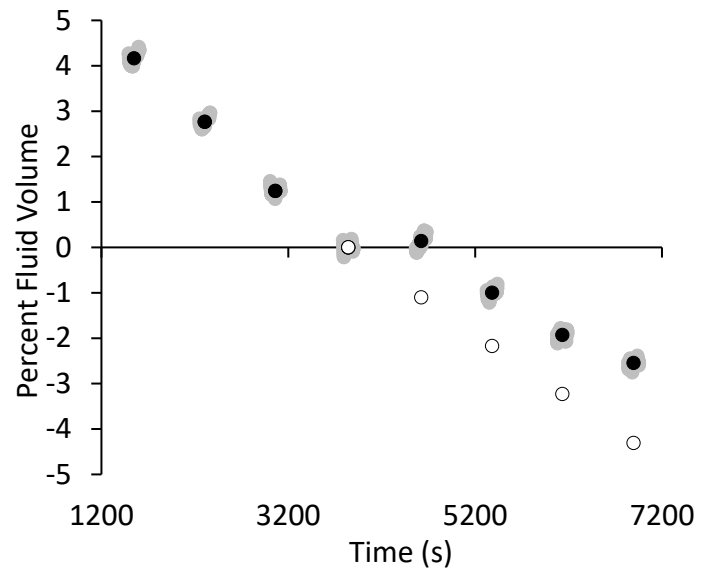

Participant # 13 – not tested

Participant # 14

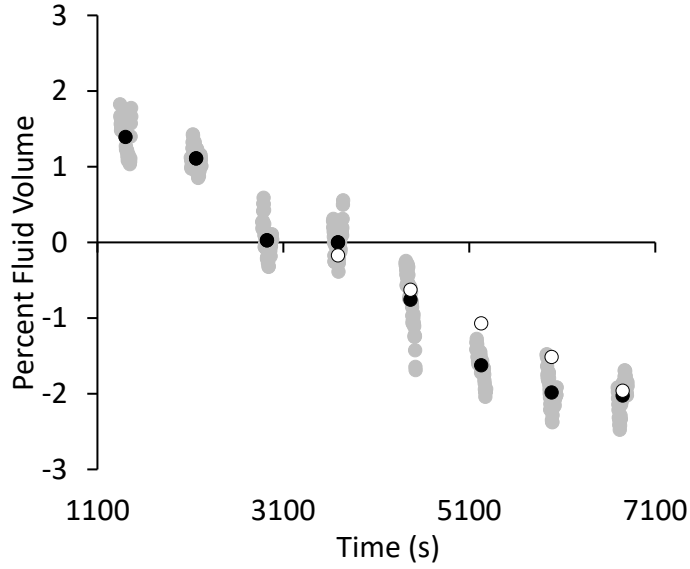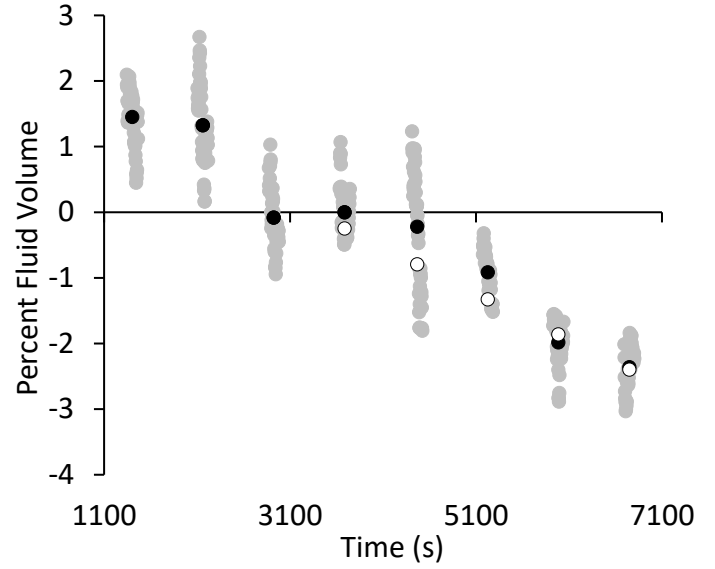

Participant # 15

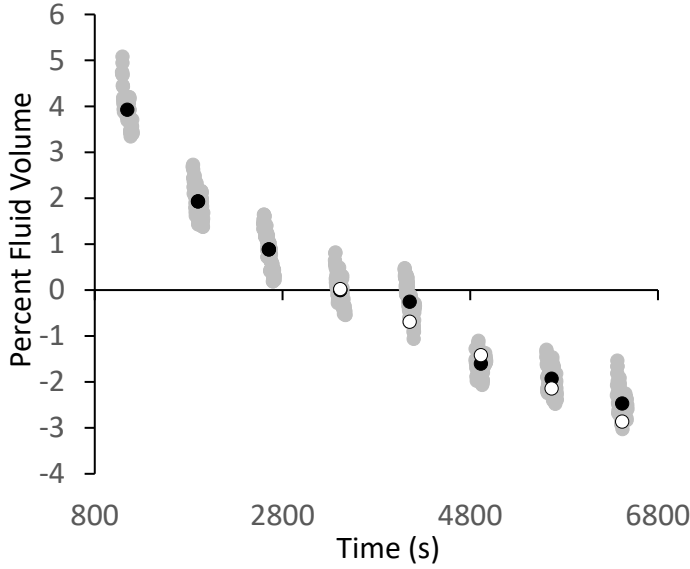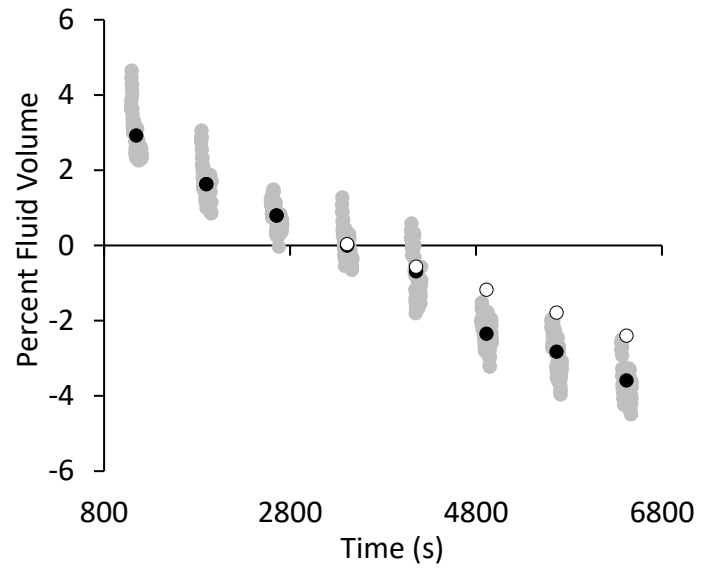

Supplement: NIHMS1605881-supplement-Appendix_3.pdf [file NIHMS1605881-supplement-Appendix_3.pdf]
