# Supplementary material
Source: PubMed Central journal article supplement (PMC7447526)
Supplement: NIHMS1605881-supplement-Appendix_1.pdf [file NIHMS1605881-supplement-Appendix_1.pdf]

**Appendix 1.** Mathematical function test results demonstrate log-tangent is the best fit.

Wilcoxon signed rank test *p*-values for short-term (cycle 5) and long-term (cycle 8) response. Italics indicates maximum, the strongest correlation within the column.

| Function    | Short-term Comparison |              | Long-term Comparison |              |
|-------------|-----------------------|--------------|----------------------|--------------|
|             | Anterior              | Posterior    | Anterior             | Posterior    |
| Linear      | 0.221                 | <i>0.507</i> | 0.033                | 0.463        |
| Logarithmic | 0.861                 | 0.221        | <i>0.807</i>         | 0.152        |
| Log/Tangent | <i>0.972</i>          | 0.345        | 0.249                | <i>0.701</i> |

Least-squares error for cycles 5 to 8. Italics indicated minimum, the lowest error within the column.

| Function    | Mean         |              | Median       |              |
|-------------|--------------|--------------|--------------|--------------|
|             | Anterior     | Posterior    | Anterior     | Posterior    |
| Linear      | 1.08%        | 1.10%        | 0.76%        | 0.70%        |
| Logarithmic | <i>0.66%</i> | <i>0.95%</i> | 0.58%        | 0.63%        |
| Log/Tangent | 0.79%        | 0.96%        | <i>0.49%</i> | <i>0.60%</i> |
