# Supplementary material
Source: PubMed Central journal article supplement (PMC7447526)
Supplement: NIHMS1605881-supplement-Appendix_2.pdf [file NIHMS1605881-supplement-Appendix_2.pdf]

**Appendix 2.** Percent error for short-term (cycle 5) and long-term (cycle 8) projection data. Results from No Intervention tests.

|        | Short-Term (cycle 5) |           | Long-Term (cycle 8) |           |
|--------|----------------------|-----------|---------------------|-----------|
|        | Anterior             | Posterior | Anterior            | Posterior |
| Mean   | 0.04%                | -0.06%    | 0.41%               | 0.26%     |
| Median | 0.09%                | -0.05%    | 0.54%               | -0.21%    |
| SD     | 0.51%                | 0.81%     | 1.44%               | 2.22%     |
| Min    | -0.81%               | -1.42%    | -2.64%              | -1.89%    |
| Max    | 1.05%                | 2.23%     | 3.42%               | 6.89%     |
